# Supplementary material for: CREAM: Clustering of genomic REgions Analysis Method
Source: bioRxiv or medRxiv preprint supplement (doi:10.1101/222562), 2018-03-20
Supplement: Supplementary file [file 222562-4.pdf]

**Supplementary Figure 1.** Comparison of expression of genes in proximity of CREAM-specific COREs were significantly higher than genes in proximity of ROSE-specific COREs in both GM12878 and K562 cell lines.

**Supplementary Figure 2.** Comparing the percentage of COREs which overlap with promoters, exons, introns, and intergenic regions for COREs identified by CREAM or ROSE in GM12878 and K562 cell lines.

**Supplementary Figure 3.** Difference between enrichment of transcription factor binding intensity within CREAM-identified COREs and ROSE-identified COREs excluding the CRE-free gaps.
